# Supplementary material for: All-printed solid-state supercapacitors with versatile shapes and superior flexibility for wearable energy storage
Source: Royal Society of Chemistry journal article supplement (doi:10.1039/c9ta03513c), 2019-01-01
Supplement: c9ta03513c1.pdf [file c9ta03513c1.pdf]

**All-Printed Solid-State Supercapacitors with Versatile Shapes and Superior  
Flexibility for Wearable Energy Storage**

Jing Liang <sup>a</sup>, Yu Feng <sup>a</sup>, Li Liu <sup>a</sup>, Shuaiqi Li <sup>a</sup>, Changzhong Jiang <sup>b</sup>, Wei Wu <sup>a, c\*</sup>

<sup>a</sup> Laboratory of Printable Functional Nanomaterials and Printed Electronics, School of Printing  
and Packaging, Wuhan University, Wuhan 430072, P. R. China

<sup>b</sup> College of Materials Science and Engineering, Hunan University, Changsha 410000, P. R. China

<sup>c</sup> Shenzhen Research Institute of Wuhan University, Shenzhen 518057, P. R. China

\* Corresponding author: [weiwu@whu.edu.cn](mailto:weiwu@whu.edu.cn) (W. Wu)

The weight specific capacitance ( $C_m$ ) and areal specific capacitance ( $C_s$ ) of the electrode and the flexible supercapacitor can be calculated by the GCD curves as the following:

$$C_m = \frac{I \times \Delta t}{m \times \Delta U} \quad (1)$$

$$C_s = \frac{I \times \Delta t}{S \times \Delta U} \quad (2)$$

The energy density ( $E$ ) and power density ( $P$ ) of the electrode and supercapacitor device can be calculated by the following equations from the GCD curves:

$$E = \frac{1}{2} C_s \times \Delta U \quad (3)$$

$$P = \frac{E}{\Delta t} \quad (4)$$

Where  $m$ ,  $s$ ,  $I$ ,  $\Delta t$ ,  $\Delta U$  are the mass of the active electrode materials, the effective areal of the supercapacitor, the operate current, the discharged time and the potential window.

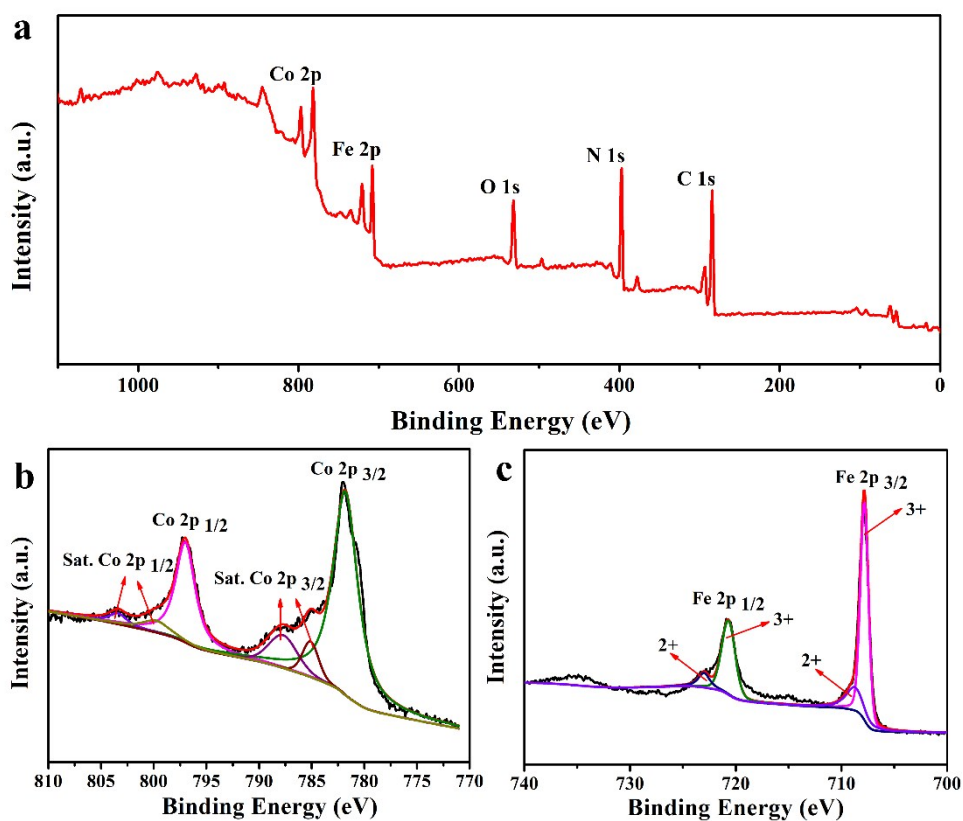

**Fig. S1** (a) The XPS spectra of CoHCF nanocubes, (b) the Co 2p and (c) Fe 2p.

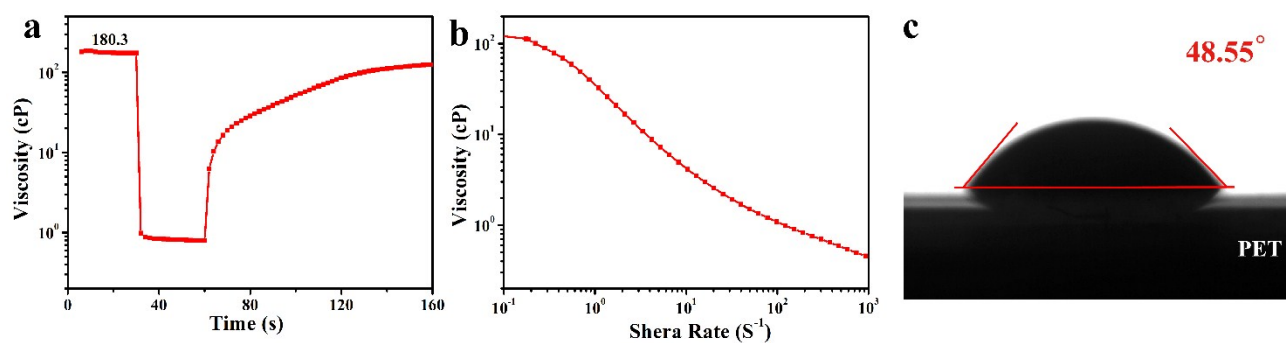

**Fig. S2** (a) The thixotropic behavior and (b) relationships between viscosity and the shear rate of CoHCF ink, and (c) the average contact angle test of the CoHCF ink on PET substrate.

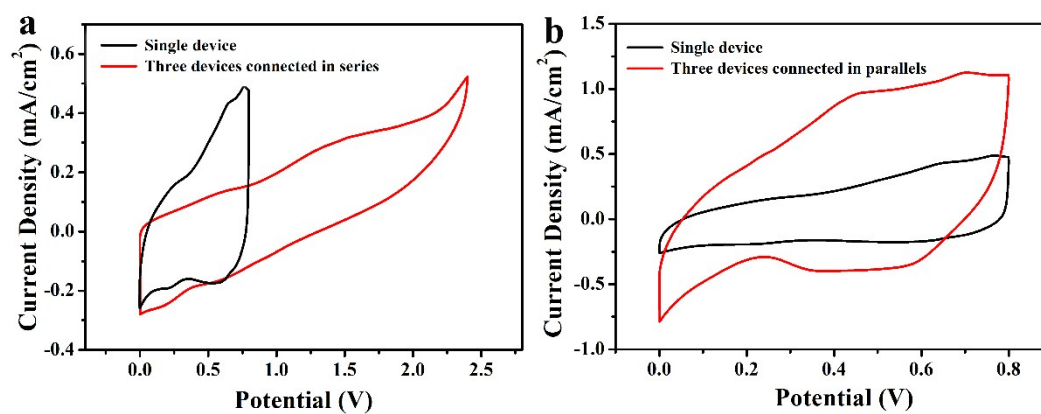

**Fig. S3** (a) The CV curves of the single device and the three CoHCF-based supercapacitors integrated in series and (b) in parallels at the scan rate of 50 mV/s.
